# Supplementary material for: FOXP3 Expression and the Tumor Microenvironment in Resected Pancreatic Ductal Adenocarcinoma: Association with Clinicopathological Prognostic Factors
Source: Research Square preprint supplement (doi:10.21203/rs.3.rs-7785348/v1), 2025-11-19
Supplement: Supplementary file 1 [file f64bac49bd5daeba7cbd8f6b.xlsx]

## Sheet: 119.04.2024 TEZ SON_SON HALİ
age	overall survival time (months)	disease-free survival (months)	health status	FOXP3ITHS	FOXP3IT-histoscore severty	FOXP3PTHS	FOXP3PT histoscore severty	FOXP3TUMOR	FOXP3TUMOR histoscore severty	stromal response score	crohnlikerespond	material tipe	tumorlokalization	invazyonderinlik	tumor type	carcinoma grade	retroperitoneal tumor	peripancreatic	llymphovascular invasion	perineural invasion	positive surgical margin pancreas	positive surgical margin retroperitoneum	proximal surgical margin	total number of regional lymph nodes	number ıf regional lymph node metastases	tumor size in mm	pT	pN
73	6	6	0	20	1	80	2	40	1	1	1	1	8	30	0	2	0	0	1	0	0	0	0	30	6	30	T3	N1
56	36	36	0	50	1	210	3	140	2	1	0	2	2	25	1	2	0	0	1	0	0	0	0	8	0	25	T3	N0
59	48	39	0	0	0	0	0	0	0	2	1	3	7	30	1	1	0	0	1	1	0	0	0	3	0	35	T2	N0
57	8	5	0	30	1	120	2	40	1	1	0	2	2	20	1	2	0	0	1	0	0	0	0	15	1	55	T3	N1
62	7	7	0	60	1	60	1	30	0	1	1	2	11	20	1	2	0	1	1	1	0	0	0	4	0	50	T3-T3	N0
64	1	12	0	180	2	180	2	0	1	1	0	2	2	35	1	2	0	0	0	0	0	0	0	4	0	35	T2	N0
69	1	11	0	60	1	120	2	100	1	1	0	2	2	20	1	2	1	1	0	0	0	0	0	28	5	30	T2	N2
67	3	2	0	90	1	90	1	0	1	2	0	2	2	25	1	2	1	1	1	1	0	1	0	14	3	45	T3	N1
73	4	1	0	40	1	100	1	120	2	1	1	2	2	35	1	3	1	1	1	1	1	1	0	17	4	45	T3	N2
76	13	10	0	140	2	140	2	140	2	3	0	2	2	30	1	2	0	1	0	1	0	0	0	5	2	41	T3	N1
42	84	84	1	30	1	60	1	30	1	1	0	1	1	8	1	2	0	0	1	1	0	0	0	5	1	18	T2 T1c	N1
74	1	1	0	40	1	60	1	30	1	1	0	2	2	27	1	2	0	1	1	1	0	0	0	8	1	47	T3	N1
75	4	4	0	60	1	40	1	20	1	1	0	2	2	20	1	2	1	1	1	1	0	0	0	5	1	40	T2	N1
58	19	16	0	0	1	20	1	0	1	2	0	2	11	13	1	2	0	1	1	1	0	0	0	31	3	40	T2	N1
76	8	8	0	80	1	80	1	60	1	1	0	2	12	17	1	2	0	1	1	1	0	0	0	2	1	26	T3b T2	N1
51	6	6	0	30	1	30	1	10	1	1	0	2	13	90	1	3	0	1	1	1	0	0	0	7	1	90	T4	N1
63	1	1	0	10	1	10	1	20	1	2	0	1	2	20	0	1	0	1	1	1	0	0	0	7	6	35	T2	N2
94	1	1	0	20	1	80	1	10	1	1	0	2	1	20	1	2	0	0	1	1	1	0	0	12	3	25	T3a T2	N1
63	1	1	0	20	1	90	1	10	1	2	0	2	2	60	1	2	0	0	1	1	0	1	0	23	1	80	T3	N1
75	3	3	0	20	1	140	2	40	1	1	0	2	12	35	1	1	1	1	1	1	0	0	0	42	10	55	T3	N2
76	1	1	0	5	1	5	1	0	1	1	0	2	12	10	1	2	0	0	1	1	0	0	0	26	0	20	T1c T2	N0
70	66	66	1	0	1	0	1	0	1	1	0	2	1	17	2	2	0	0	1	0	0	0	0	28	0	20	T2	N0
41	22	20	0	5	1	5	1	0	1	1	1	1	2	20	1	2	1	1	0	1	0	1	0	6	2	30	T2	N1
69	1	1	0	60	1	60	1	20	1	1	0	3	2	25	1	3	1	1	1	1	0	1	0	9	1	35	T2	N1
78	7	7	0	150	2	90	1	60	1	2	1	1	12	15	1	2	1	1	1	1	1	1	0	12	6	23	T3b T2	N2
51	27	22	0	100	1	100	1	20	1	1	0	1	1	20	2	1	1	1	0	1	0	1	0	26	0	25	T4 T2	N0
64	10	8	0	10	1	10	1	60	1	1	0	3	4	15	1	2	0	1	1	1	0	0	0	22	1	15	T4 T1c	N1
86	1	1	0	40	1	60	1	30	1	1	0	1	11	10	1	2	1	1	1	1	0	1	0	4	2	20	T1c	N1
51	26	26	0	0	0	0	0	0	0	2	0	2	0	1	1	0	0	0	0	1	1	0	0	0	0	1	1.0	0.0
65	17	17	0	160	2	150	2	40	1	2	0	1	2	25	1	2	0	1	1	1	0	0	0	23	5	35	T3	N2
67	12	12	0	0	1	10	1	0	1	1	0	1	1	25	1	3	0	1	1	1	0	0	0	8	2	36	T2	N1
61	10	10	0	0	0	0	0	0	0	1	0	2	2	20	1	2	0	1	1	1	0	0	0	47	7	35	T2	N2
82	7	7	0	30	1	100	1	50	1	1	0	1	12	15	1	2	0	1	1	1	0	0	0	21	2	17	T3a T1c	N1
59	61	61	1	20	1	60	1	20	1	1	1	1	2	20	1	2	0	1	1	1	0	0	0	27	2	45	T3	N1
76	1	1	0	10	1	10	1	10	1	1	1	1	2	25	1	2	1	1	1	1	0	0	0	28	7	33	T2	N2
64	1	1	0	100	1	120	2	40	1	1	0	2	2	20	1	2	1	1	0	1	0	0	0	9	5	55	T3	N2
64	3	3	0	80	1	80	1	80	1	1	0	3	7	21	1	3	0	1	1	1	1	0	0	43	2	60	T3	N1
70	1	1	0	160	2	100	1	180	2	1	1	1	2	17	23	2	1	1	0	0	0	0	0	8	1	22	T2	N1
69	1	1	0	40	1	60	1	4	1	1	0	1	2	30	1	2	0	1	1	1	0	0	0	14	2	30	T2	N1
80	11	11	0	50	1	50	1	50	1	1	0	2	4	15	1	2	0	1	1	1	1	0	0	12	1	26	T2	N1
66	1	1	0	180	2	180	2	5	1	1	1	1	2	15	1	2	0	1	1	1	0	0	0	25	1	30	T2	N1
58	23	16	0	60	1	120	2	60	1	1	0	1	11	6	1	3	0	0	1	1	0	0	0	29	7	16	T3 T1c	N2
61	3	3	0	60	1	140	2	40	1	2	0	2	2	30	1	2	1	1	1	1	0	1	0	18	12	50	T3	N2
58	54	54	1	0	1	5	1	0	1	1	1	1	2	20	1	2	0	1	1	1	0	0	0	0	0	37	T2	N0
59	55	55	1	5	1	5	1	0	1	2	0	6	7	40	1	2	0	1	1	1	0	0	0	20	4	55	T3	N2
70	7	5	0	100	1	100	1	100	1	2	0	1	2	15	1	2	0	1	1	1	0	0	0	37	11	20	T1c	N2
81	10	10	0	240	3	240	3	60	1	1	0	2	2	20	1	2	0	1	1	1	0	0	0	17	6	33	T2	N2
73	2	2	0	50	1	50	1	0	1	1	0	3	7	15	1	2	1	1	1	1	0	0	0	3	1	55	T3	N1
42	16	26	0	10	1	20	1	0	1	1	1	1	2	30	1	2	0	1	1	1	0	0	1	23	7	35	T2	N2
55	6	6	0	140	2	140	2	70	1	1	0	1	1	15	1	3	0	0	1	0	0	0	0	11	1	20	T1b T1c	N1
82	51	51	1	10	1	140	2	0	1	1	1	1	4	10	1	2	0	1	1	1	0	0	0	17	6	55	T3	N2
84	4	4	0	10	1	0	1	0	1	2	0	1	2	28	1	2	0	1	1	1	1	0	0	9	1	40	T2	N1
72	2	2	0	60	1	240	3	60	1	1	1	1	11	11	1	3	1	0	1	1	0	0	0	22	3	10	T1c	N1
61	62	62	1	60	1	160	2	40	1	1	0	1	11	20	1	2	0	1	1	1	0	0	0	21	9	30	T2	N2
71	7	7	0	40	1	140	2	30	1	3	0	2	8	15	1	2	1	1	1	1	0	0	0	8	1	35	T2	N1
58	3	3	0	5	1	5	1	0	1	1	1	1	2	10	1	2	1	1	1	0	0	1	0	16	9	17	T1c	N2
67	1	1	0	5	1	30	1	0	1	2	1	1	5	30	1	2	1	1	1	1	0	0	0	24	8	60	T4	N2
84	61	61	1	20	1	100	1	20	1	2	1	1	11	8	1	2	0	1	1	1	0	0	0	26	7	24	T2	N2
70	2	25	1	0	1	5	1	0	1	1	0	2	2	40	1	3	0	1	1	1	0	0	0	28	2	50	T3	N1
60	3	3	0	10	1	10	1	0	1	2	0	2	8	41	1	2	1	1	1	1	1	1	0	28	6	52	T3	N2
60	11	9	0	0	1	120	2	0	1	1	0	1	2	25	1	3	1	1	1	1	0	1	0	8	5	30	T2	N2
61	13	11	0	300	3	300	3	160	2	1	0	1	4	25	1	2	0	1	1	1	0	0	0	11	6	35	T2	N2
73	20	17	0	140	2	140	2	0	1	1	0	2	4	23	1	2	0	1	1	1	0	0	0	33	2	40	T2	N1
68	16	16	0	30	1	30	1	10	1	2	0	1	2	10	1	2	1	1	1	1	0	1	0	7	0	20	T1c	N0
63	14	7	0	0	1	40	1	0	1	2	0	1	4	10	1	2	0	1	0	1	0	0	0	20	0	25	T2	N0
77	1	26	1	80	1	210	3	100	1	1	0	1	2	17	1	3	0	1	1	1	0	0	0	44	3	75	T3	N1
71	7	6	0	60	1	60	1	80	1	1	0	1	2	35	1	3	0	1	1	1	0	0	0	22	3	40	T2	N1
54	18	19	0	5	1	10	1	0	1	1	0	2	1	25	1	2	0	1	1	1	0	0	0	27	2	30	T3b T2	N1
67	56	21	1	0	1	0	1	0	1	3	1	1	2	30	1	2	0	1	1	1	0	0	0	11	3	35	T2	N1
61	14	7	0	5	1	5	1	0	1	1	0	2	11	25	1	3	0	1	1	1	1	0	0	24	1	32	T2	N1
60	15	15	0	20	1	160	2	70	1	1	0	2	4	30	1	2	1	1	1	1	0	1	0	26	7	50	T3	N2
73	10	9	0	40	1	100	1	20	1	2	0	1	2	15	1	2	0	1	1	1	0	0	0	32	11	23	T2	N2
47	55	12	1	210	3	140	2	210	3	2	1	2	2	30	1	2	0	1	1	1	1	0	0	30	1	45	T3	N1
71	0	0	0	60	1	40	1	40	1	1	0	2	4	30	1	3	1	1	1	1	0	0	0	32	6	45	T3	N2
84	4	4	0	80	1	80	1	0	1	2	1	1	11	30	1	2	1	1	1	1	0	0	0	14	7	54	T3	N2
58	39	39	1	10	1	10	1	0	1	3	0	2	11	14	1	3	0	0	0	0	0	0	0	24	0	20	T1c	N0
66	5	4	0	30	1	40	1	30	1	1	0	1	1	14	1	2	0	0	1	1	0	0	0	15	6	17	T1c	N2
65	38	38	1	80	1	80	1	40	1	1	0	1	3	4	1	2	0	0	1	1	0	0	0	6	1	25	T2	N1
72	37	25	1	120	2	160	2	240	3	2	0	1	2	25	1	2	0	1	1	1	0	0	0	13	6	30	T2	N2
64	36	36	1	180	2	180	2	60	1	1	1	2	4	24	1	3	0	1	1	1	0	0	0	21	0	30	T2	N0
65	25	24	1	80	1	80	1	40	1	1	0	1	2	20	1	2	1	1	1	1	0	0	0	17	6	25	T2	N2
85	1	1	0	60	1	120	2	60	1	1	0	1	4	20	1	2	1	1	1	1	0	0	0	22	3	30	T2	N1
57	1	1	0	180	2	180	2	80	1	1	1	1	12	30	1	2	0	1	1	1	0	0	0	24	1	45	T3	N1
74	6	6	0	60	1	210	3	210	3	2	1	1	4	10	1	2	1	1	1	1	0	0	0	19	5	42	T3	N2
60	32	32	1	240	3	300	3	120	2	1	0	1	2	22	1	2	1	1	1	1	0	0	0	21	1	30	T2	N1
69	1	1	0	70	1	140	2	70	1	1	1	2	2	20	1	2	1	1	1	1	0	0	0	24	0	25	T2	N0
78	41	41	1	120	2	160	2	240	3	2	0	2	2	30	1	2	0	1	1	1	0	0	0	31	12	41	T3	N2
51	41	41	1	285	3	285	3	285	3	2	0	2	2	10	1	2	1	1	1	1	0	0	0	13	2	20	T1c	N1
78	42	42	1	270	3	270	3	210	3	2	1	2	2	10	1	2	0	1	1	0	0	0	0	30	4	30	T2	N2
68	42	42	1	40	1	80	1	60	1	2	1	1	2	20	1	3	1	1	1	1	0	0	0	10	0	35	T2	N0
72	1	1	0	180	2	180	2	180	2	2	1	2	4	28	1	3	1	1	1	1	0	1	0	32	1	48	T3	N1
83	2	2	0	60	1	30	1	20	1	1	0	2	1	10	1	3	1	0	1	1	0	0	0	21	1	11	T1c	N1
81	1	1	0	30	1	50	1	40	1	1	0	1	2	10	1	2	0	0	0	0	0	0	0	15	1	15	T1c	N1
71	42	42	1	60	1	60	1	60	1	1	0	2	1	16	1	2	1	1	1	1	0	0	0	26	15	50	T3	N2
62	42	42	1	210	3	210	3	270	3	1	2	1	2	15	1	1	1	1	1	1	0	0	0	27	7	30	T2	N2
63	8	6	1	100	1	100	1	160	2	2	0	2	12	25	1	2	1	1	1	1	0	0	0	10	2	40	T2	N1
73	6	6	1	160	2	270	3	160	2	2	0	1	3	7	1	2	0	1	1	1	0	0	0	16	8	25	T2	N2
68	1	1	0	210	3	210	3	140	2	1	0	3	7	30	1	2	0	1	1	1	0	0	0	20	5	100	T3	N2

## Sheet: explanation of the headings
health status: 0: died, 1: alive
Foxp3 ITHS: FoxP3 intratumoral histoscore
FoxP3 THS: FoxP3 tumor histoscore
FoxP3 PTHS: FoxP3 peritumoral histoscore
stromal response score: 1: score 1, 2:score 2, 3: score 3
crohn like response: 0: no 1: yes
material type: 1:whipple procedure gastric protection, 2:whipple procedure no gastric protection, 3: distal pancreatectomy, 4: mass excision, 5: ampullectomy, 6: dital pacreatectomy, gastrectomy, splenectomy
tumor localization: 0: no tumor, 1: ampulla and papilla, 2:pancreatic head, 3: cpmmon bile duct, 4: ampulla-papilla-common bile duct-pancreatic, 5: pancreatic body, 6: pacreatic tail, 7: pancreatic body-tail, 8: pancreatic head and other parts, 9: pancreatic duct, 10: gallbladder, 11: common bile duct-pancreatic, 12: papilla-ampulla-pancreatic, 13: gallbladder, pancreatic
tumortype: 0 well-differentiated adenocarcinoma, 1: biliary-type adenocarcinoma, 2: Intestinal type adenocarcinoma, 3: mucinous adenocarcinoma, 4: squamous cell carcinoma, 5: adenosquamous carcinoma, 6: intrauctal papillary neoplasm, 7:intraduktal mucinous neoplasm-IPMN, 9: serous cystadenoma, 10: musinous cystadenoma, 11: solid pseudopapillary neoplasm, 12: pancreatic pseudocyst 13: Low-grade mu…
carcinoma grade: 1: grade 1, 2: grade 2, 3: grade 3, 4: undifferentiated
retroperitoneal tumor: 0: no 1: yes
peripancreatic tumor: 0: no, 1: yes
lymphovascular invasion: 0: no, 1: yes
perineural invasion: 0: no, 1: yes
positive surgical margin pancreas: 0: no, 1: yes
positive surgical margin retroperitoneum: 0: no, 1: yes
proximal surgical margin: 0: no, 1: yes
